# Supplementary material for: Retinoic Acid Signal Negatively Regulates Osteo/Odontogenic Differentiation of Dental Pulp Stem Cells
Source: Hindawi journal article supplement (doi:10.1155/2020/5891783), 2020-06-27
Supplement: f1 [file 5891783.f1.pdf]

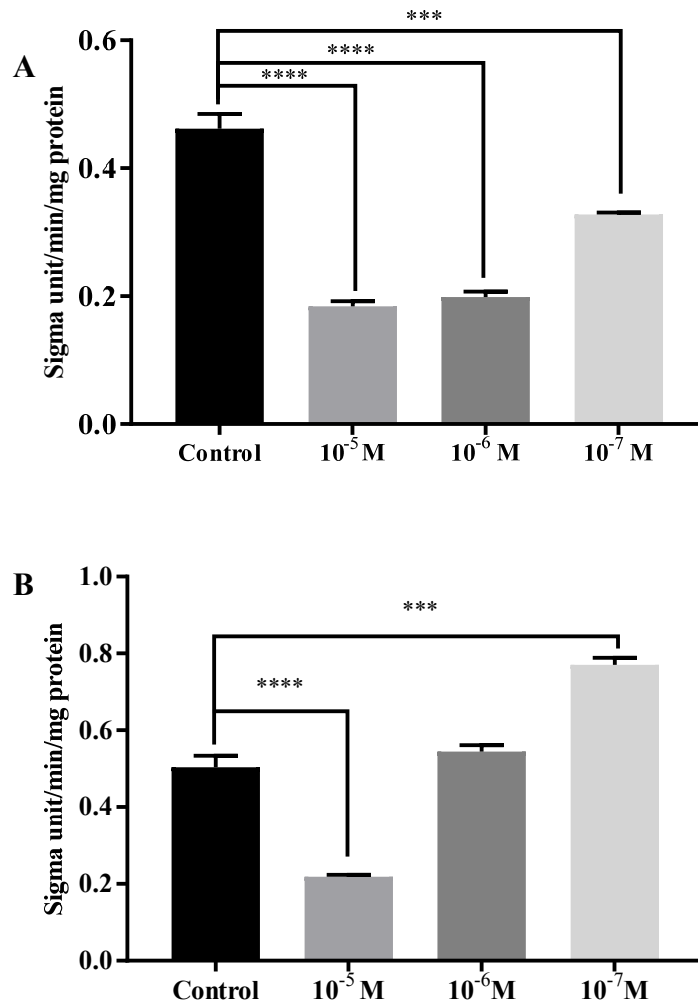

Supplementary Figure 1. Intervention in RA signal with different concentrations of RA and BMS 493 *in vitro* altered the ALP activities differentially (A, B). ALP activities were significantly suppressed by  $10^{-7}$  M,  $10^{-6}$  M,  $10^{-5}$  M RA (A). ALP activities were significantly enhanced by  $10^{-7}$  M BMS 493, but decreased by  $10^{-5}$  M BMS 493 and changed little by  $10^{-6}$  M BMS 493 (B).
